# Supplementary material for: Integrated machine learning survival framework for consensus modeling in a large multicenter cohort of NSCLC resistant to aumolertinib
Source: Research Square preprint supplement (doi:10.21203/rs.3.rs-6311145/v1), 2025-05-06

Fig. S1A. TCGA-LUAD, GSE72094, GSE50081, GSE30219, GSE13213 and the c-index of ARRPS in MetaCohort and 40 published signatures

Fig. S2A. Genomically altered landscapes characterized by low and high ARRPS.

Fig. S3A. GISTIC 2.0-based gene copy number variation and mutation frequency in high and low ARRPS scores.

Fig. S4A. Forest plot of genes mutating differentially in patients of the low- and the high-ARRPS groups.

Fig. S5A. Interaction effect of genes mutating differentially in patients in the low- and the high-ARRPS groups.

Fig. S6 A-B. Body weight changes in nude mice over the course of treatment.


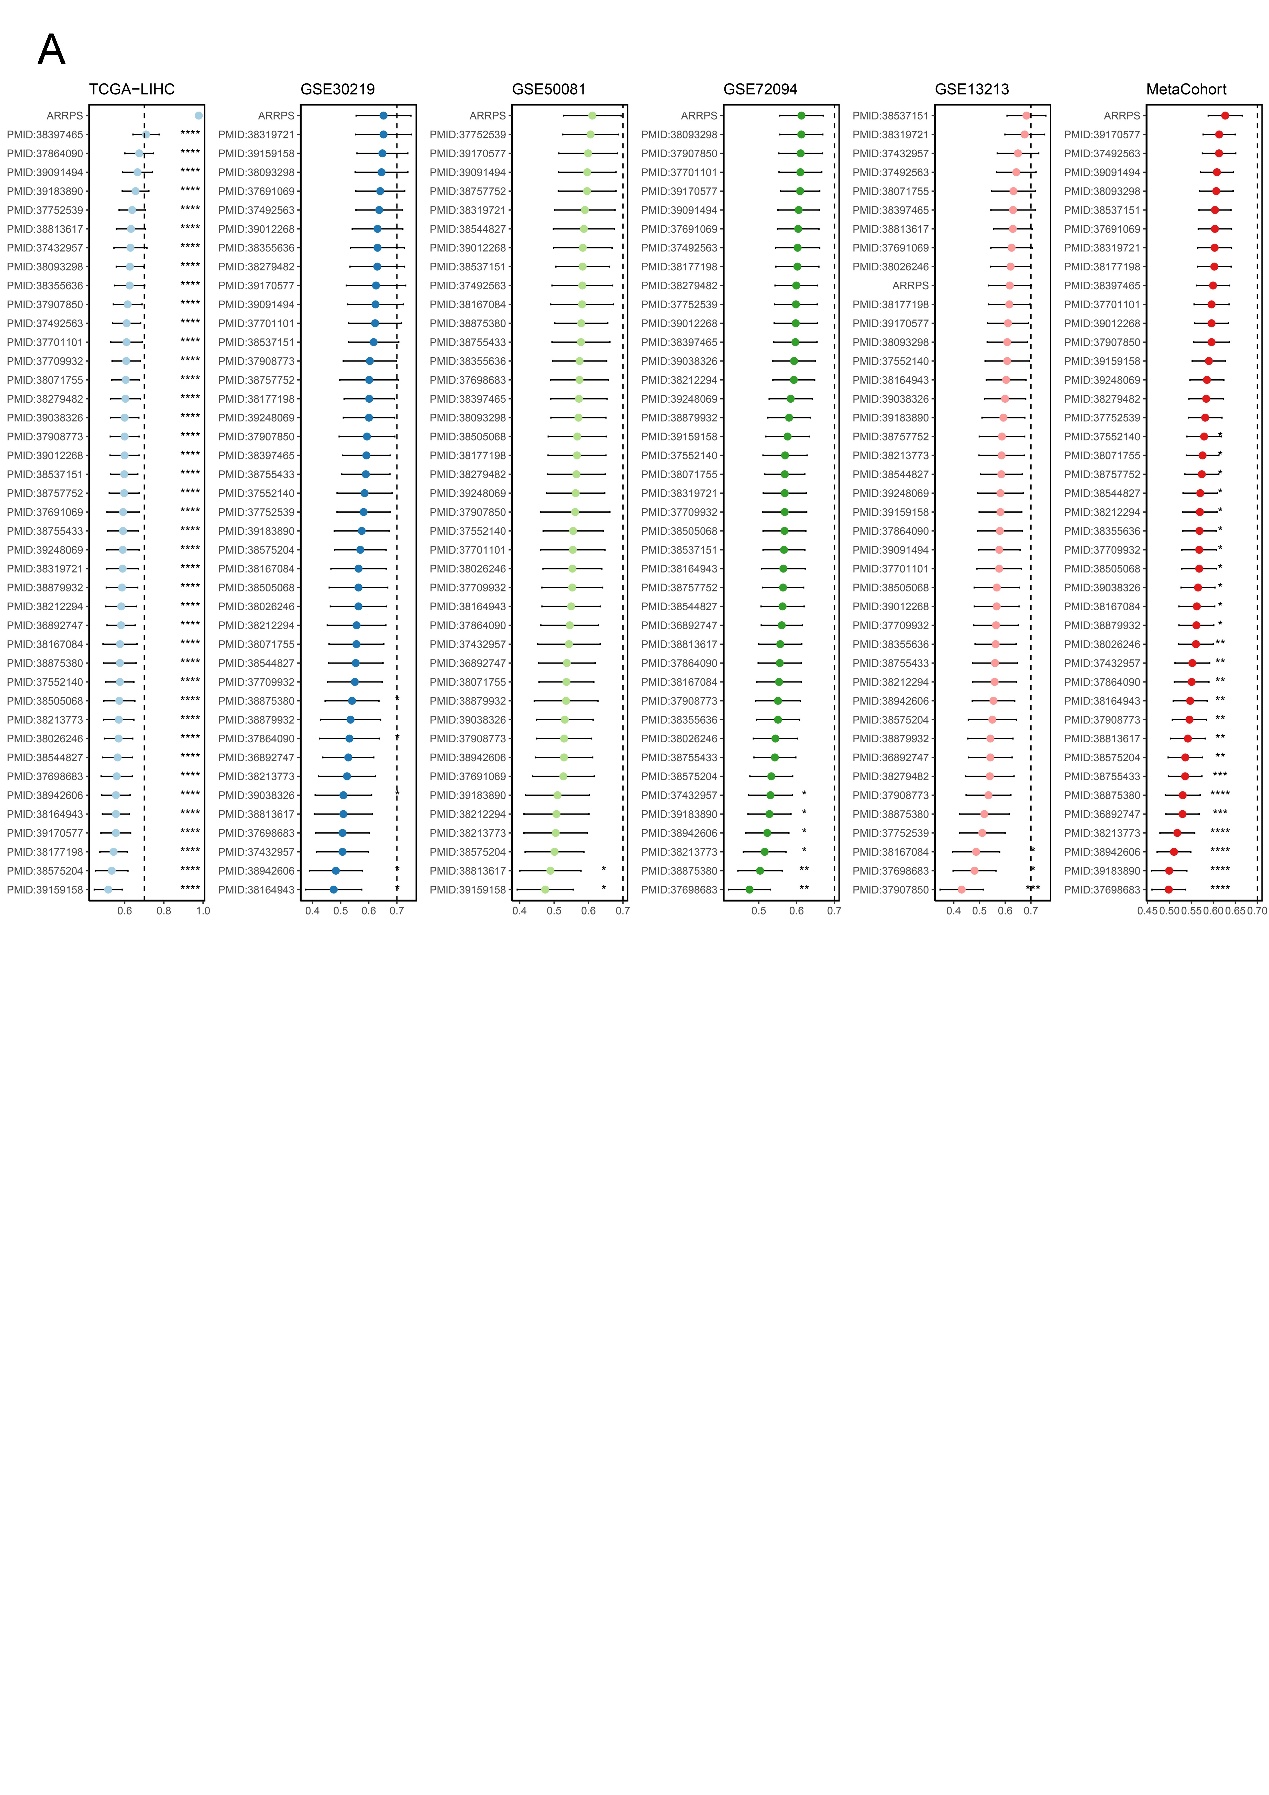

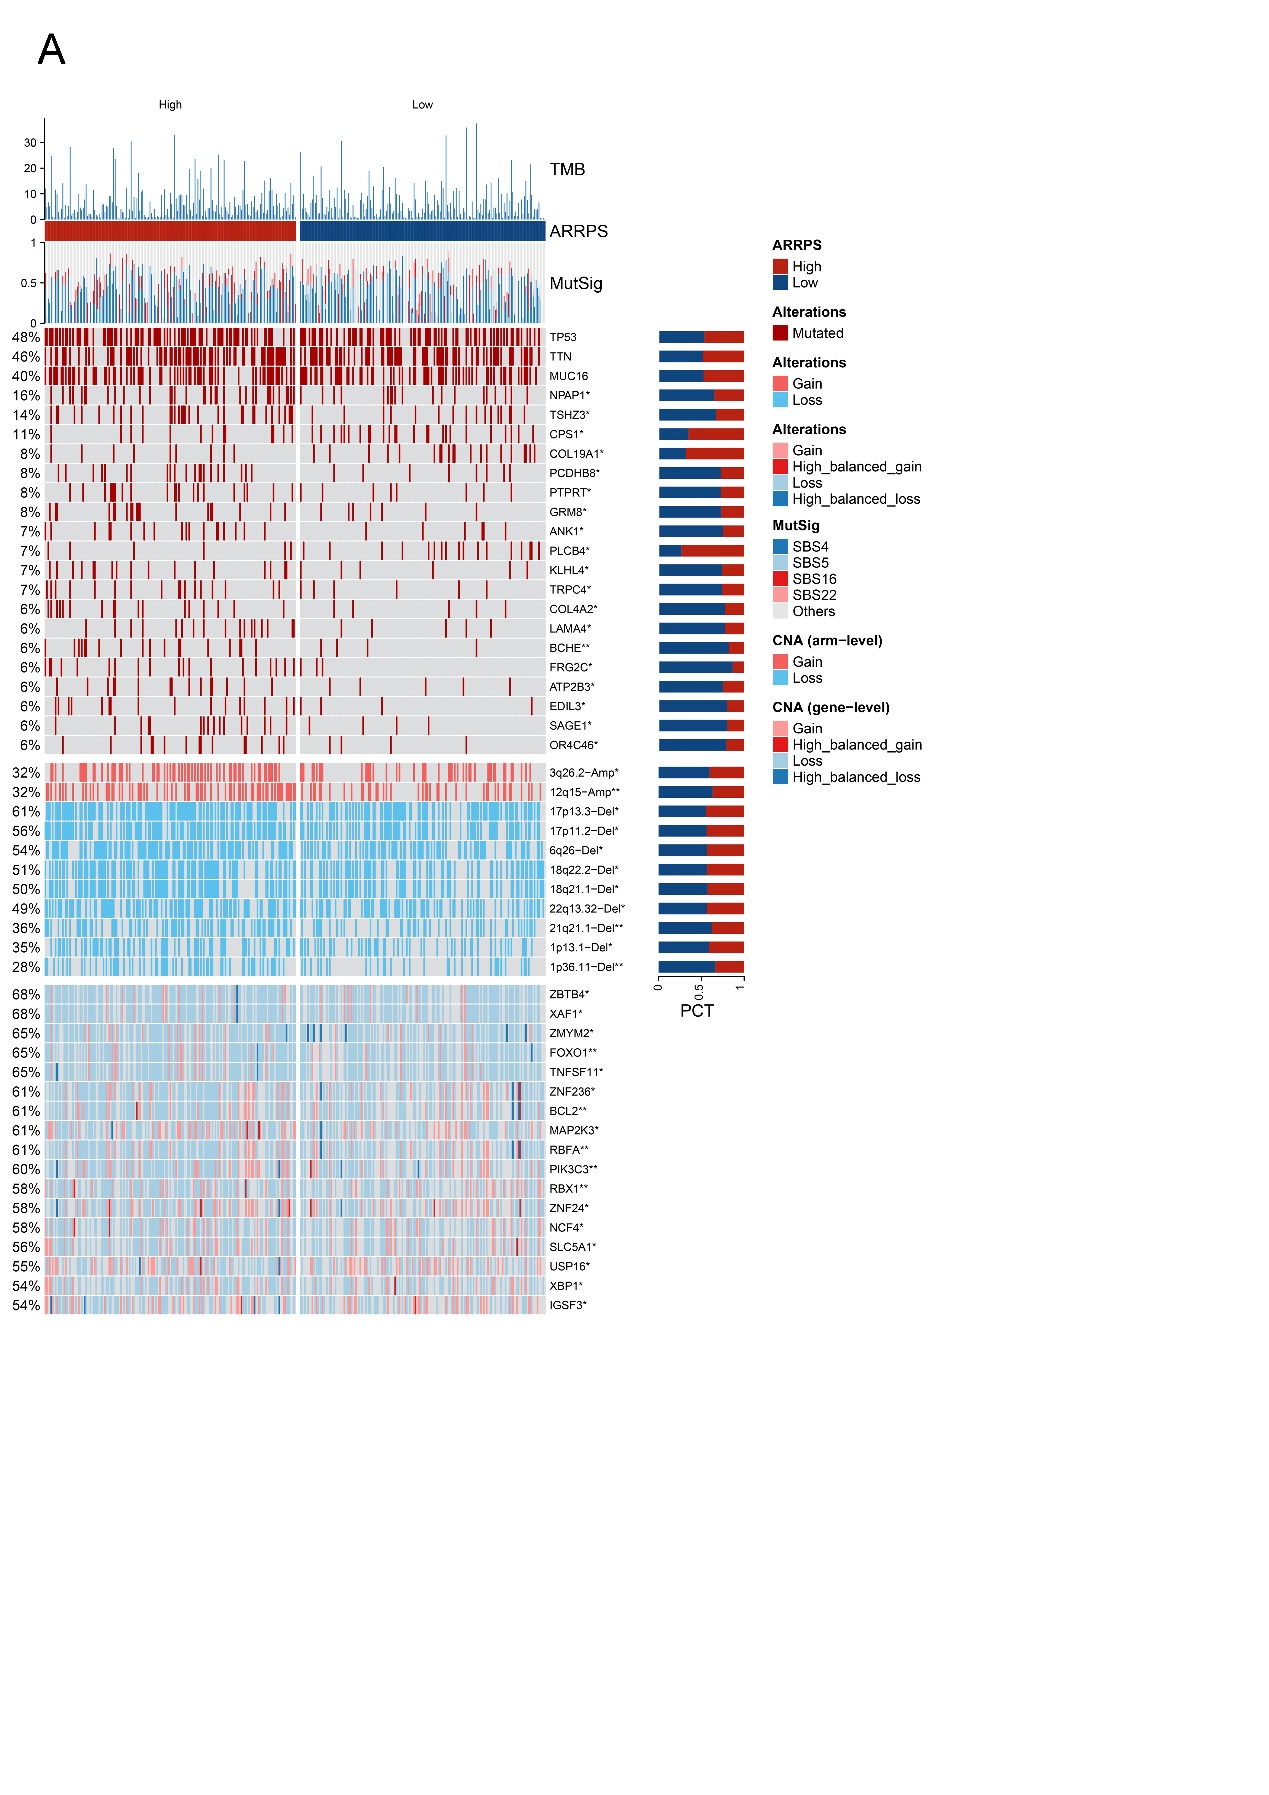

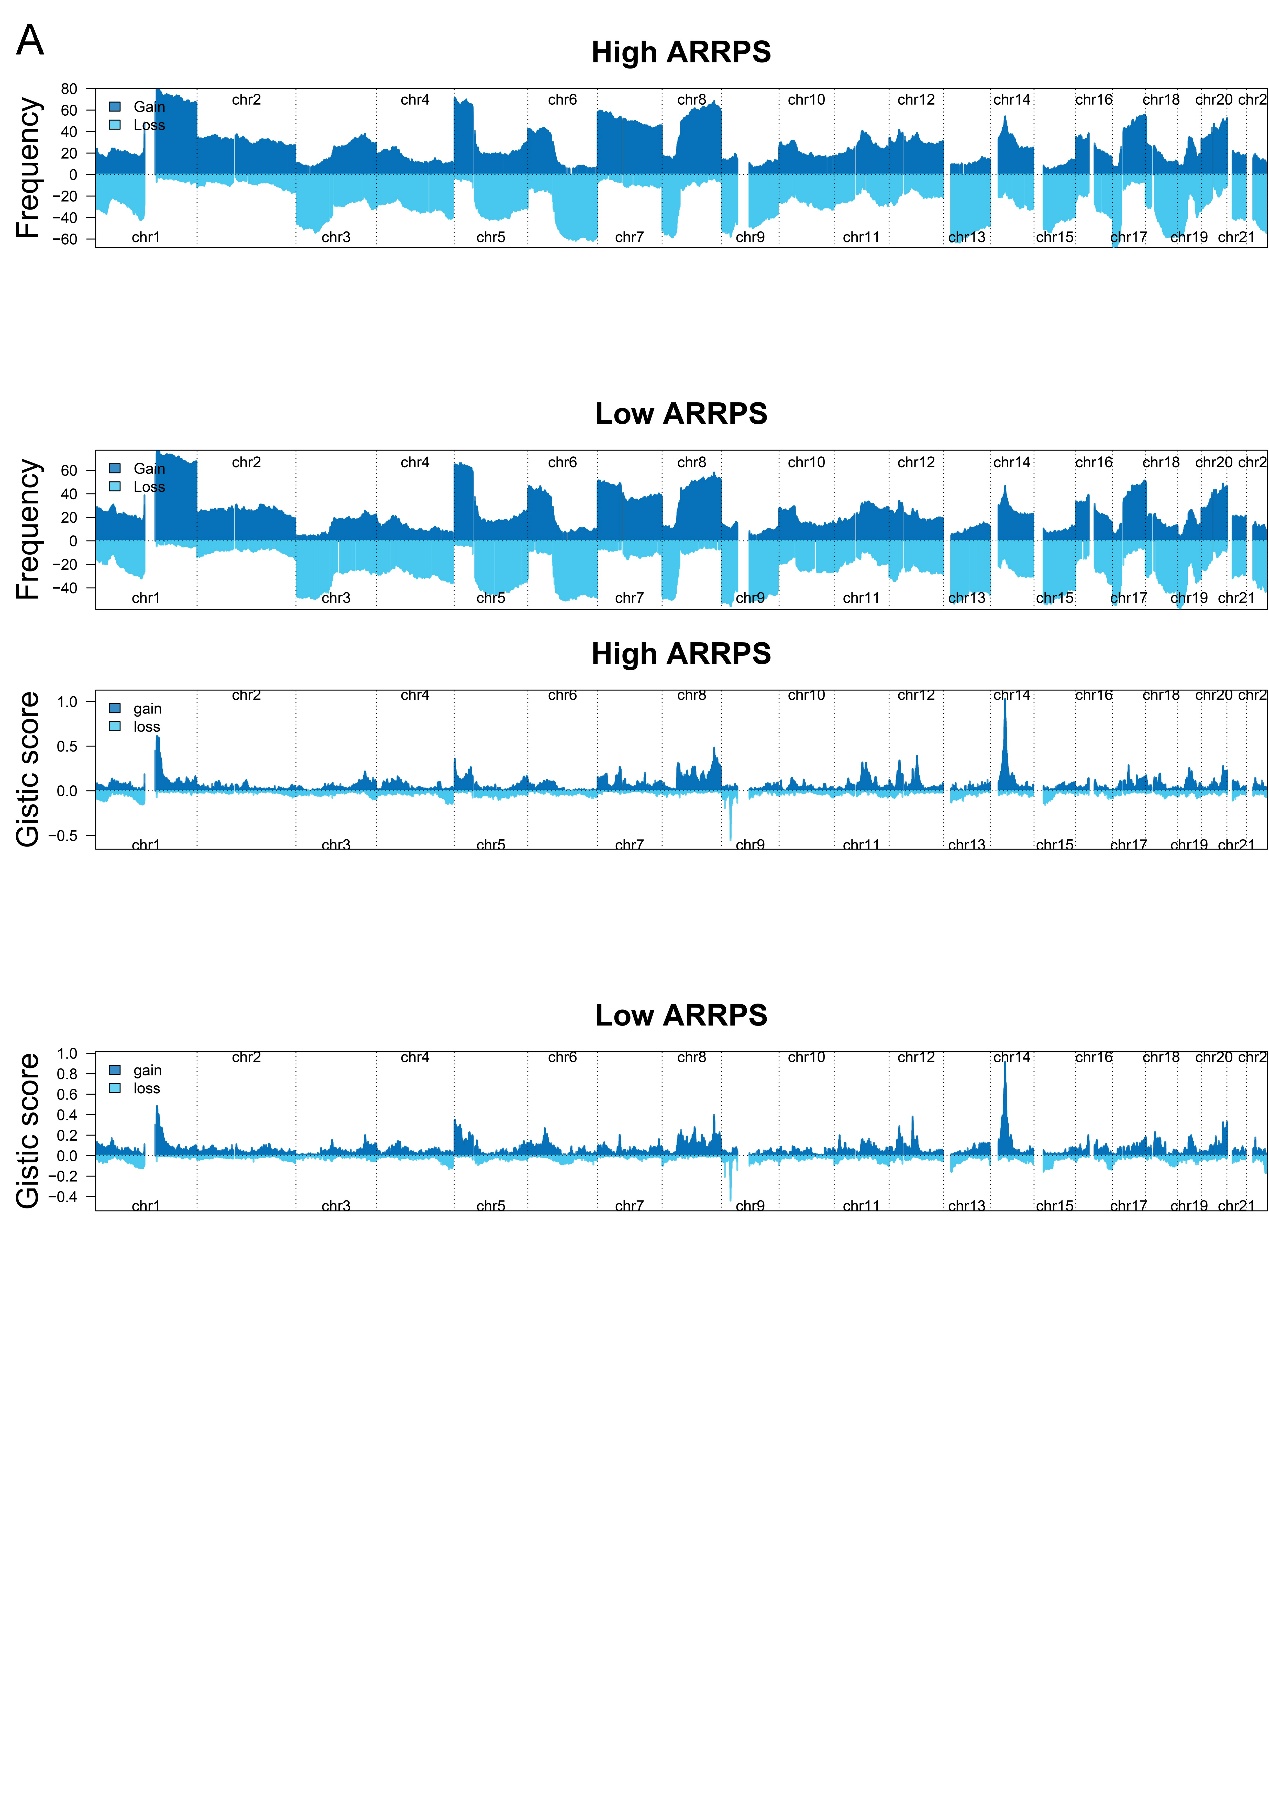

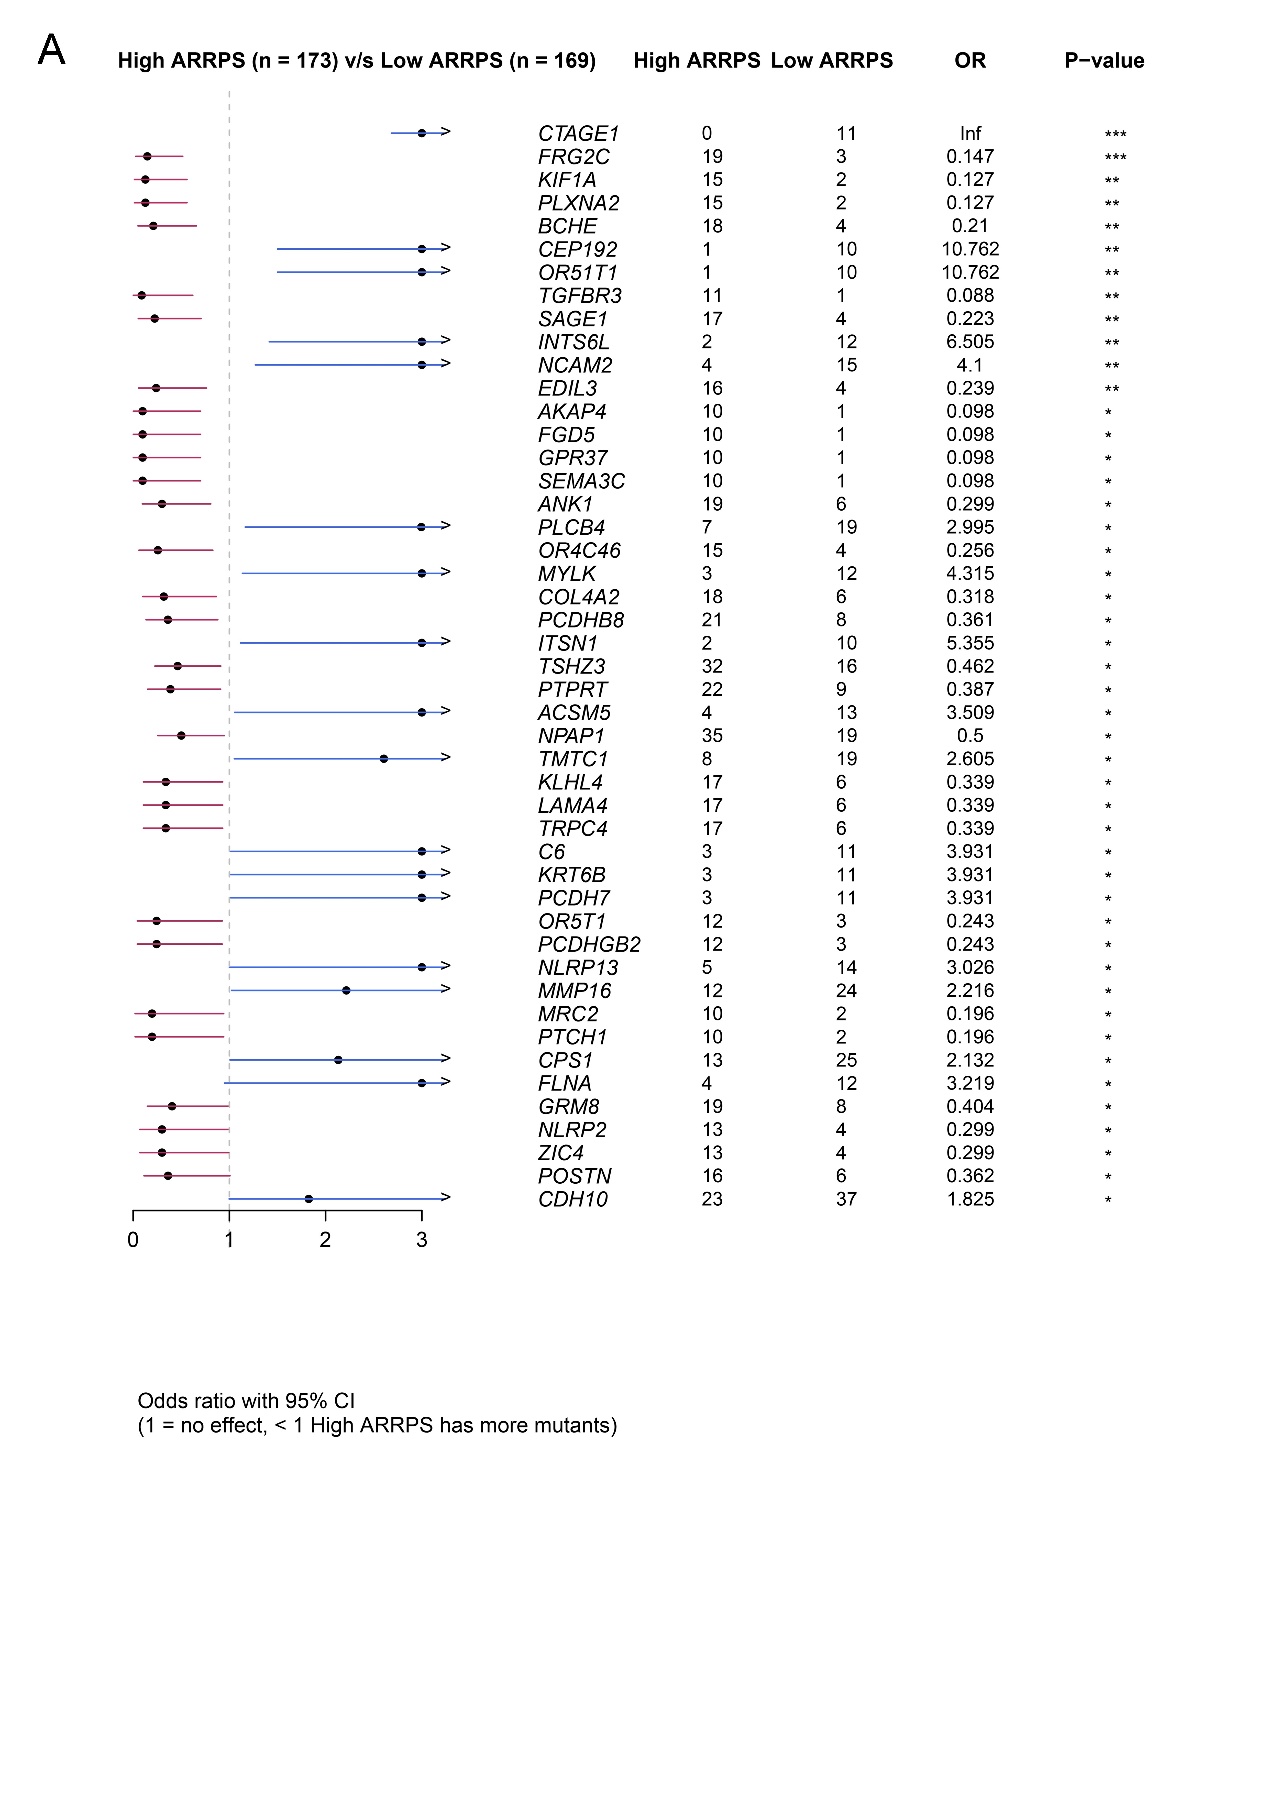

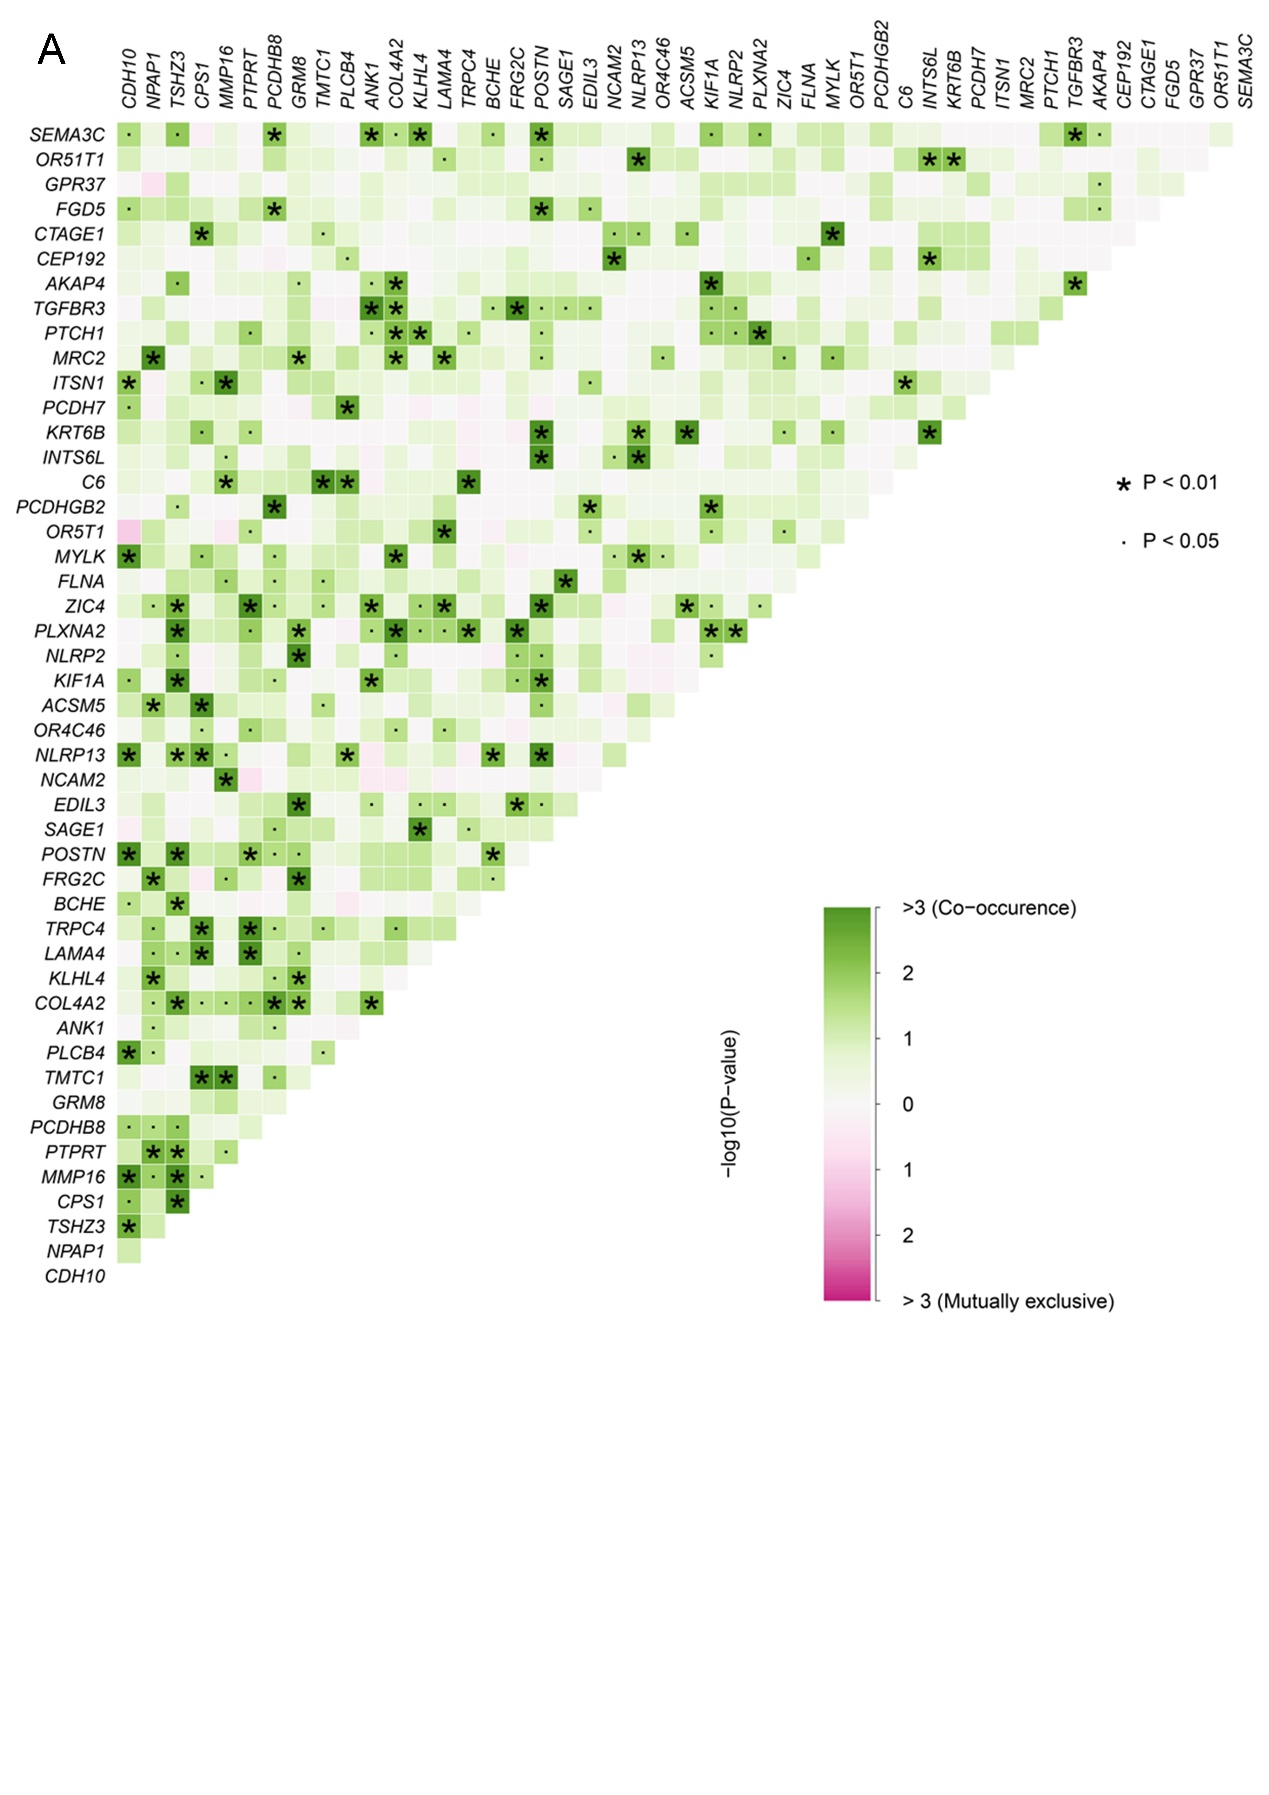

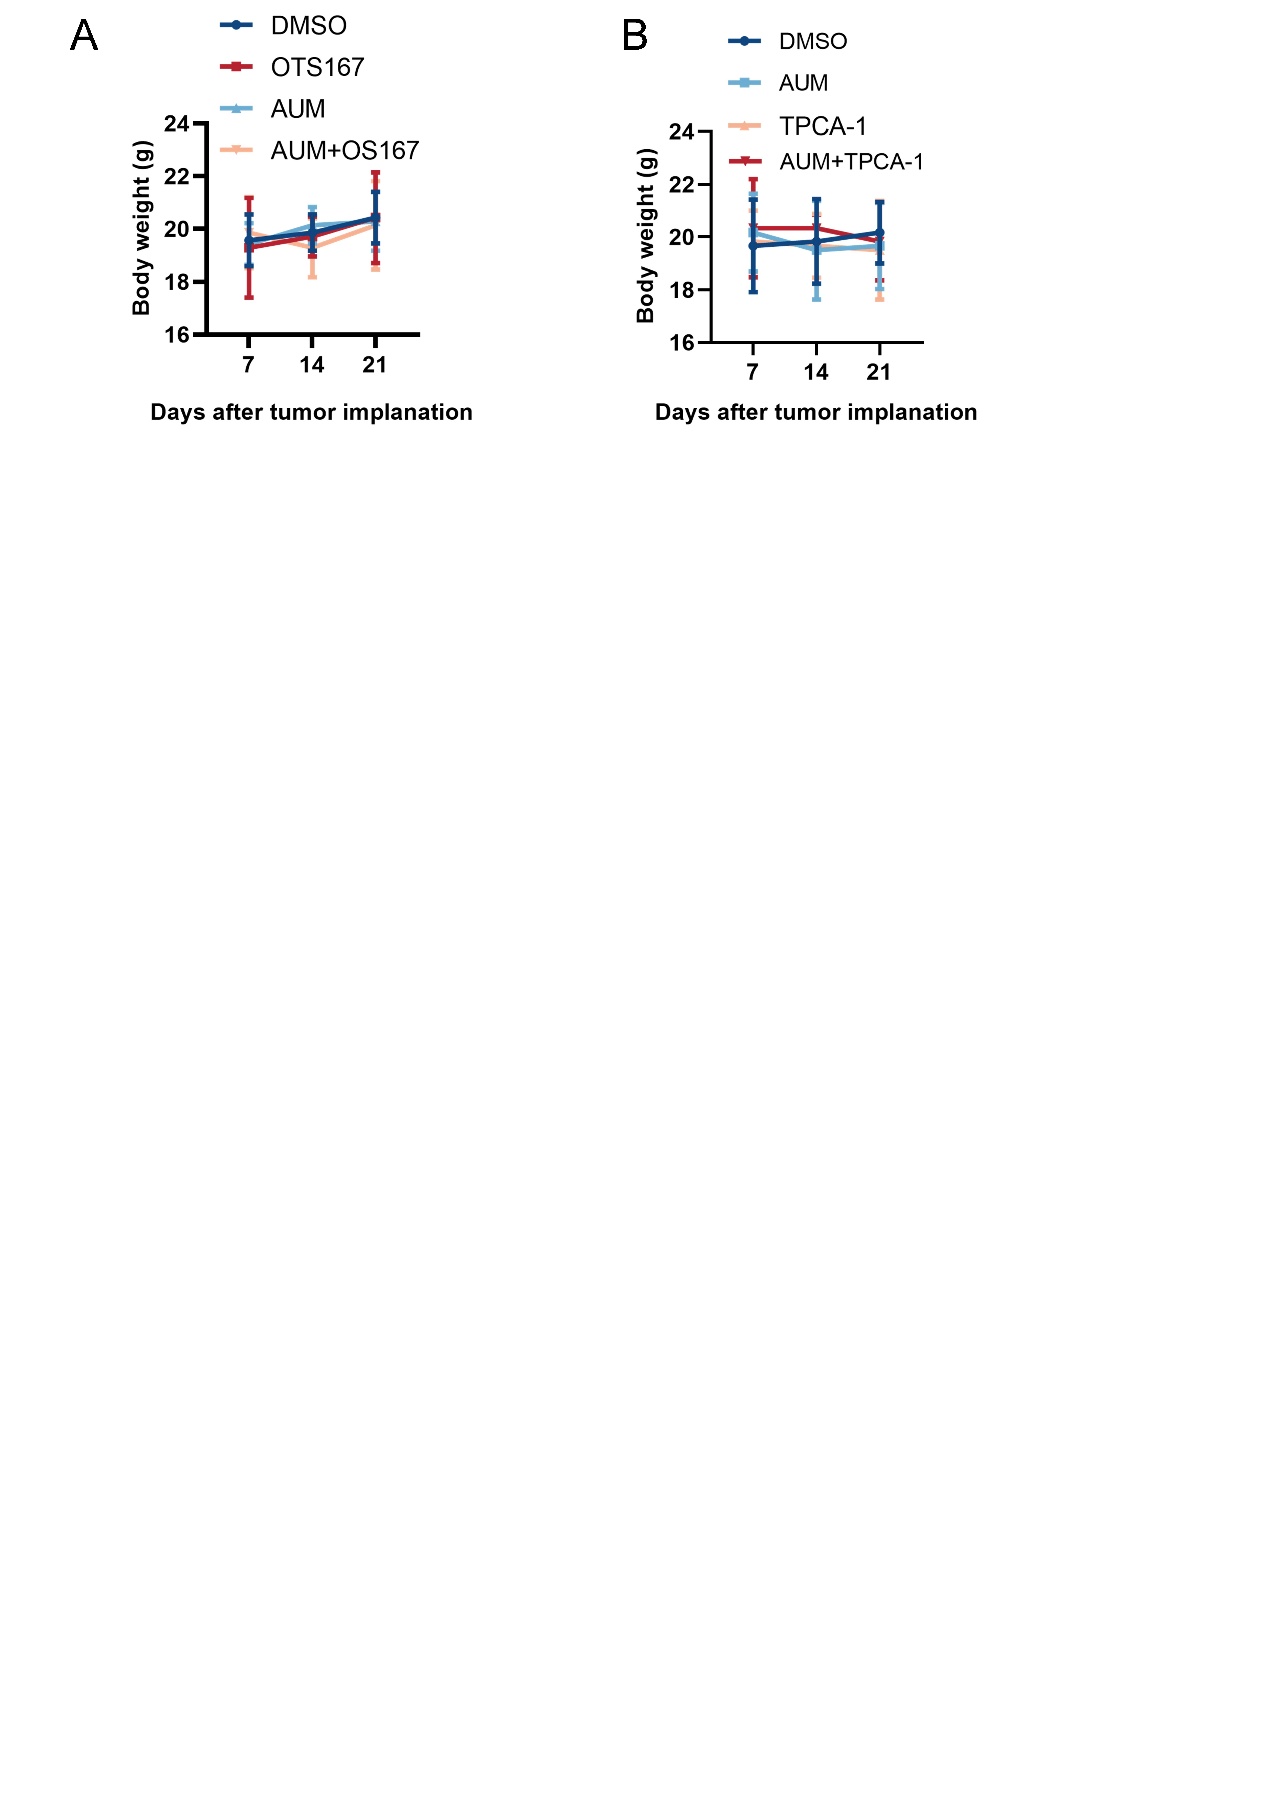

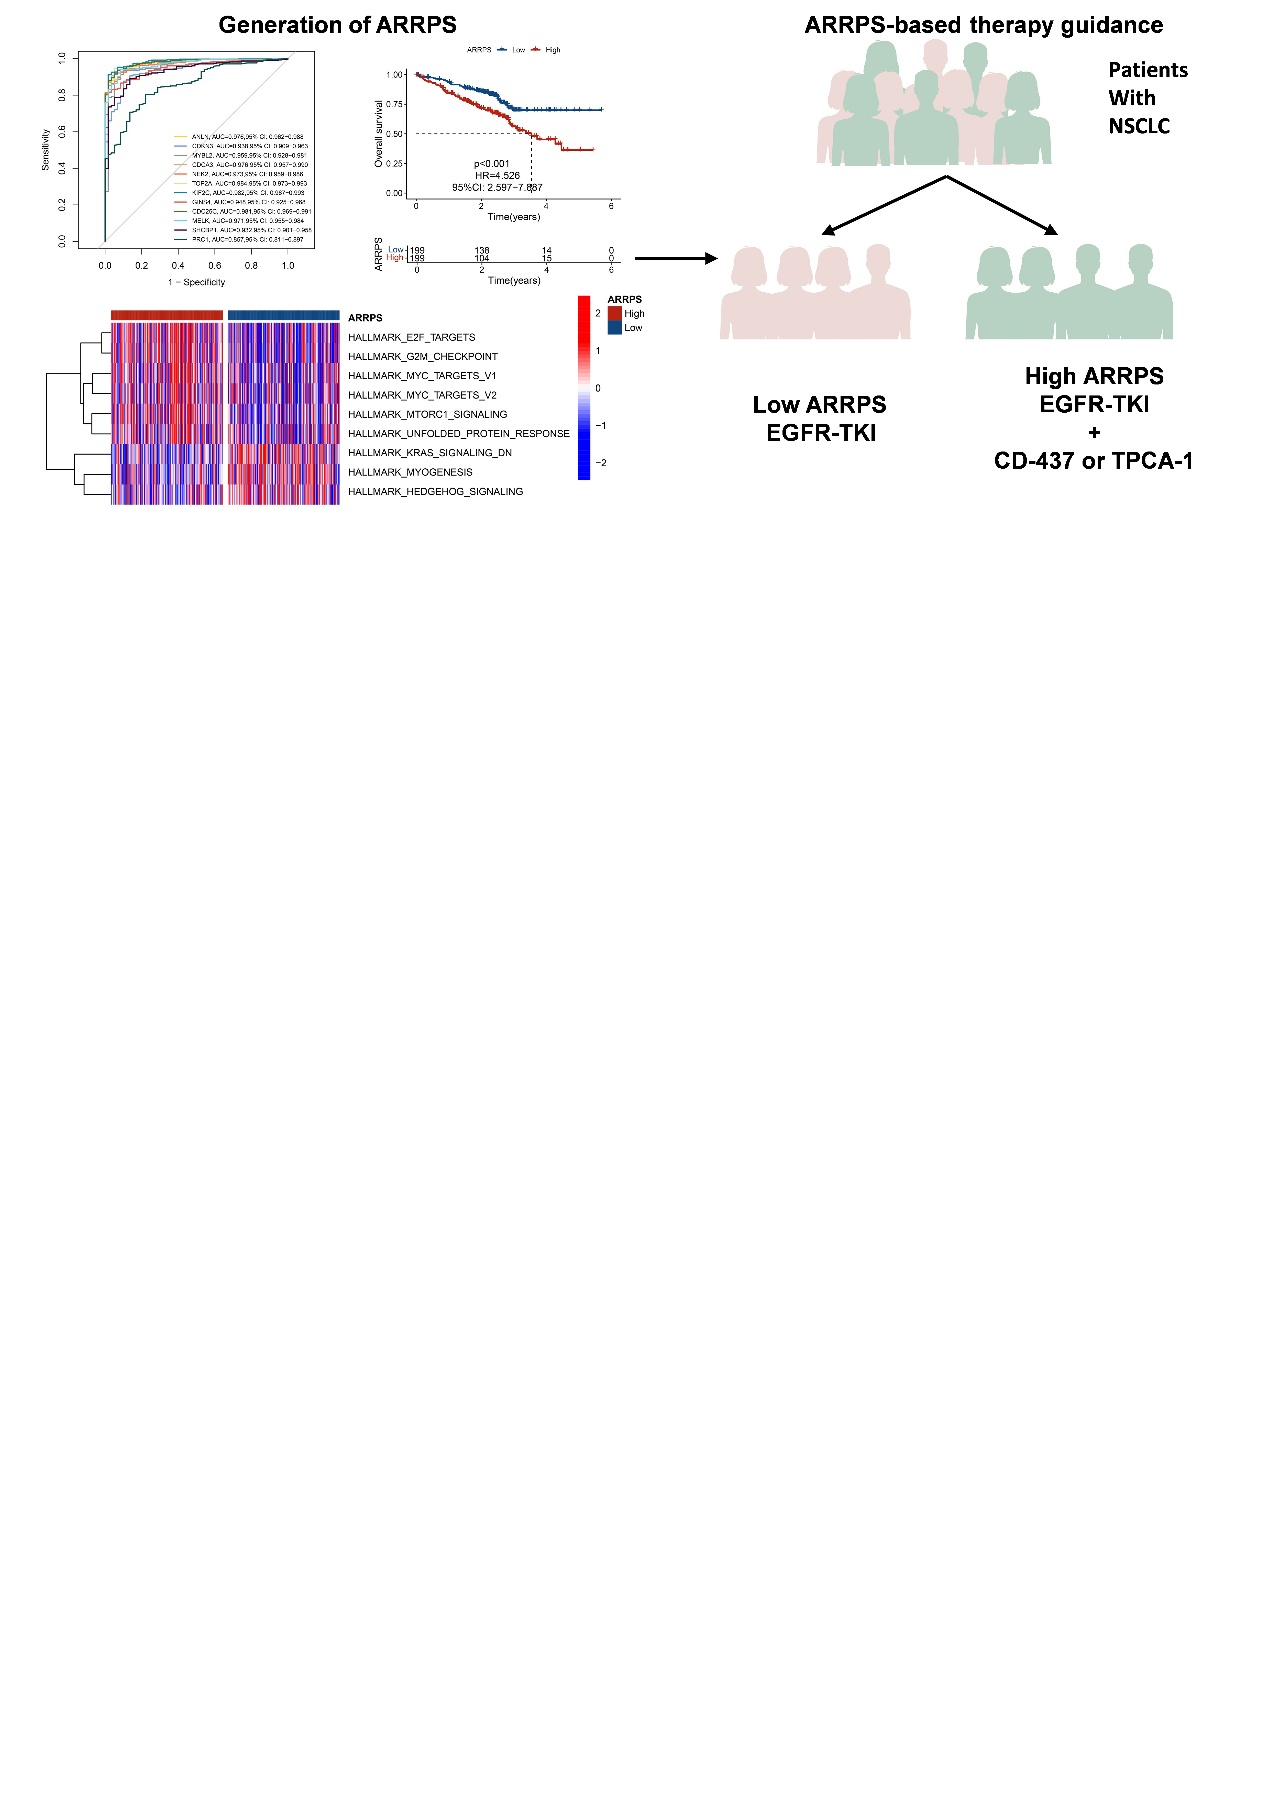

Supplement: Supplementary file 1 [file 8d53619cae87f7df89289c84.docx]
